# Supplementary material
Source: PubMed Central journal article supplement (PMC4077612)
Supplement: NIHMS580293-supplement-Appendix_A.pdf [file NIHMS580293-supplement-Appendix_A.pdf]

**Appendix A. Relationship between Mortality and CPP Thresholds by Age Group (<11 years old)**

| CPP Thresholds                  | Survivors (N=1681) | Non-Survivors (N=379) | Relative Risk (95% C.I) | p-value <sup>4</sup> |
|---------------------------------|--------------------|-----------------------|-------------------------|----------------------|
| <b>0-11 years old</b>           |                    |                       |                         |                      |
| N=                              | 101                | 19                    |                         |                      |
| <b>CPP-H events<sup>1</sup></b> | 74 (91.4)          | 7 (8.6)               | Ref                     |                      |
| <b>CPP-B events<sup>2</sup></b> | 24 (82.8)          | 5 (17.2)              | 1.99 (0.58, 5.80)       | 0.29                 |
| <b>CPP-L events<sup>3</sup></b> | 3 (30.0)           | 7 (70.0)              | 8.10 (3.58, 18.31)      | <.0001               |
| <b>0-5 years old</b>            |                    |                       |                         |                      |
| N=                              | 55                 | 10                    |                         |                      |
| <b>CPP-H events<sup>1</sup></b> | 32 (91.4)          | 3 (8.6)               | Ref.                    |                      |
| <b>CPP-B events<sup>2</sup></b> | 12 (85.7)          | 2 (14.3)              | 1.67 (0.31, 8.93)       | 0.62                 |
| <b>CPP-L events<sup>3</sup></b> | 2 (33.3)           | 4 (66.7)              | 7.78 (2.29, 26.37)      | 0.005                |
| <b>6-11 years old</b>           |                    |                       |                         |                      |
| N=                              | 46                 | 9                     |                         |                      |
| <b>CPP-H events<sup>1</sup></b> | 42 (91.3)          | 4 (8.7)               | Ref                     |                      |
| <b>CPP-B events<sup>2</sup></b> | 12 (80.0)          | 3 (20.0)              | 2.30 (0.58, 9.13)       | 0.35                 |
| <b>CPP-L events<sup>3</sup></b> | 1 (25.0)           | 3 (75.0)              | 8.63 (2.89, 25.76)      | 0.007                |

<sup>1</sup> CPP >40 for 0-5 years old, >50 for 6-11 years old, >60mmHg for >12 years old

<sup>2</sup> CPP 30-40 for 0-5 years old, 35-50 for 6-11 years old, 50-60mmHg for >12 years old

<sup>3</sup> CPP <30 for 0-5 years old, <35 for 6-11 years old, <50mmHg for >12 years old

<sup>4</sup> Calculated from Fisher's Exact Test
